# Supplementary material for: Electrocaloric refrigeration capacity in BNT-based ferroelectrics benefiting from low depolarization temperature and high breakdown electric field
Source: Royal Society of Chemistry journal article supplement (doi:10.1039/d1ta02543k), 2021-01-01
Supplement: d1ta02543k1.pdf [file d1ta02543k1.pdf]

Supporting Information for  
Electrocaloric refrigeration capacity in BNT-based  
ferroelectrics benefiting from low depolarization temperature  
and high breakdown electric field

Ling Zhang<sup>1</sup>, Chunlin Zhao<sup>1</sup>, Ting Zheng<sup>1</sup> and Jiagang Wu<sup>1,\*</sup>

<sup>1</sup>*Department of Materials Science, Sichuan University, Chengdu, 610064, China*

\*Corresponding author. Email: msewujg@scu.edu.cn and wujiagang0208@163.com

**Table S1:** Lattice parameters and refined structure parameters of BNT-BZ<sub>x</sub>T: yAlN ( $x = 0.1-0.3, y = 0, 0.2, 0.25, 0.3$  wt%) ceramics.

| Sample                       | Space group         | a (Å)  | c (Å)   | Sig   | R <sub>wp</sub> (%) |
|------------------------------|---------------------|--------|---------|-------|---------------------|
| $x = 0.1, y = 0$             | <i>P4mm</i> (52.4%) | 3.9055 | 3.9515  | 1.643 | 6.503               |
|                              | <i>R3c</i> (47.6%)  | 5.5499 | 13.4678 |       |                     |
| $x = 0.2, y = 0$             | <i>P4mm</i> (42.6%) | 3.9165 | 3.9549  | 1.404 | 5.974               |
|                              | <i>R3c</i> (57.4%)  | 5.5507 | 13.3292 |       |                     |
| $x = 0.3, y = 0$             | <i>P4mm</i> (42%)   | 3.9262 | 3.9571  | 1.37  | 5.943               |
|                              | <i>R3c</i> (58%)    | 5.5237 | 13.6079 |       |                     |
| $x = 0.2,$<br>$y = 0.2$ wt%  | <i>P4mm</i> (43.4%) | 3.9145 | 3.9547  | 1.568 | 6.3                 |
|                              | <i>R3c</i> (56.6%)  | 5.5374 | 13.4187 |       |                     |
| $x = 0.2,$<br>$y = 0.25$ wt% | <i>P4mm</i> (43.4%) | 3.9117 | 3.9531  | 1.531 | 6.39                |
|                              | <i>R3c</i> (56.6%)  | 5.5309 | 13.4138 |       |                     |
| $x = 0.2,$<br>$y = 0.3$ wt%  | <i>P4mm</i> (38.8%) | 3.9137 | 3.9583  | 1.578 | 6.42                |
|                              | <i>R3c</i> (61.2%)  | 5.5363 | 13.3927 |       |                     |

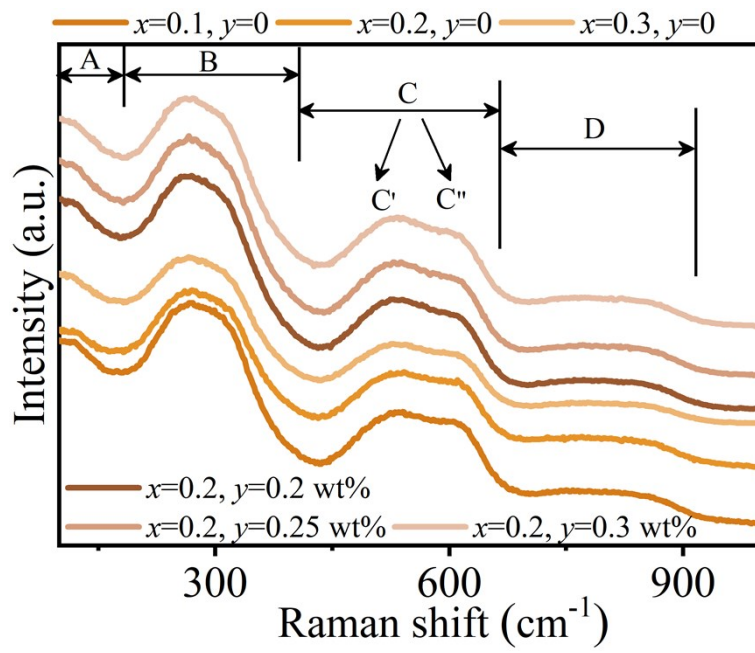

**Fig. S1.** Raman spectra of BNT-BZ<sub>x</sub>T: yAlN ( $x = 0.1-0.3$ ,  $y = 0, 0.2, 0.25, 0.3$  wt%) ceramics.

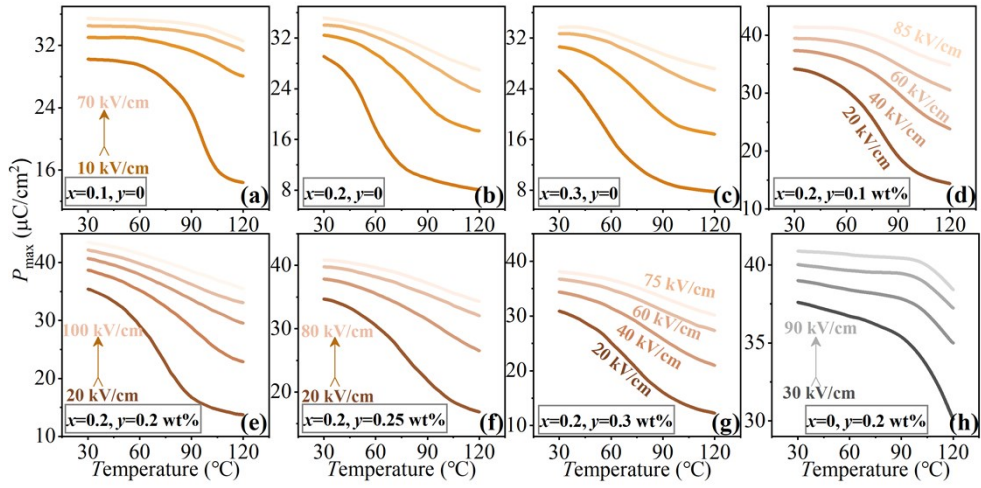

**Fig. S2.**  $P_{\max}$ - $T$  curves for BNT-BZ<sub>x</sub>T:  $y$ AlN ceramics with (a)  $x = 0.1$ ,  $y = 0$ , (b)  $x = 0.2$ ,  $y = 0$ , (c)  $x = 0.3$ ,  $y = 0$ , (d)  $x = 0.2$ ,  $y = 0.1$  wt%, (e)  $x = 0.2$ ,  $y = 0.2$  wt%, (f)  $x = 0.2$ ,  $y = 0.25$  wt%, (g)  $x = 0.2$ ,  $y = 0.3$  wt%, and (h)  $x = 0$ ,  $y = 0.2$  wt% under different electric fields.

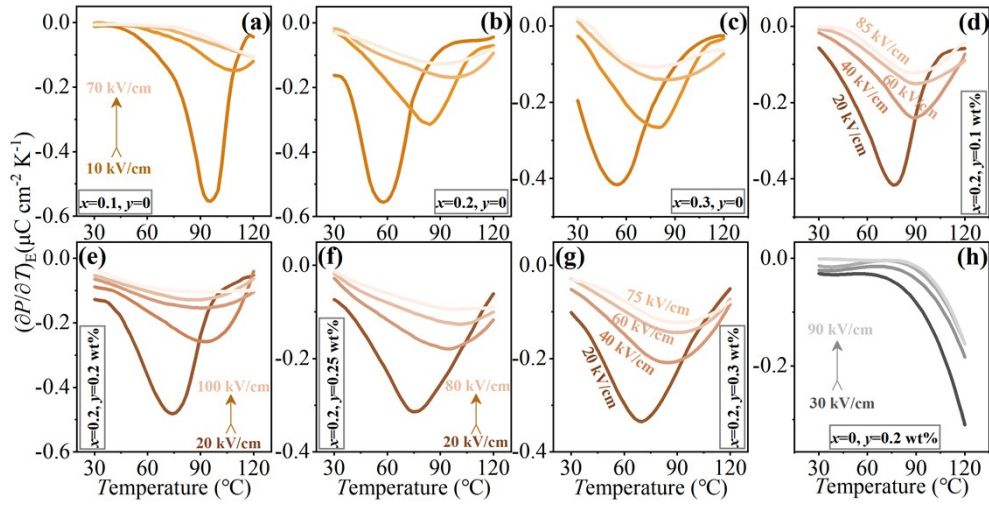

**Fig. S3.** Plots of  $(\partial P/\partial T)_E-T$  for BNT-BZ<sub>x</sub>T: yAlN ceramics with (a)  $x = 0.1, y = 0$ , (b)  $x = 0.2, y = 0$ , (c)  $x = 0.3, y = 0$ , (d)  $x = 0.2, y = 0.1$  wt%, (e)  $x = 0.2, y = 0.2$  wt%, (f)  $x = 0.2, y = 0.25$  wt%, (g)  $x = 0.2, y = 0.3$  wt%, and (h)  $x = 0, y = 0.2$  wt% under different electric fields.

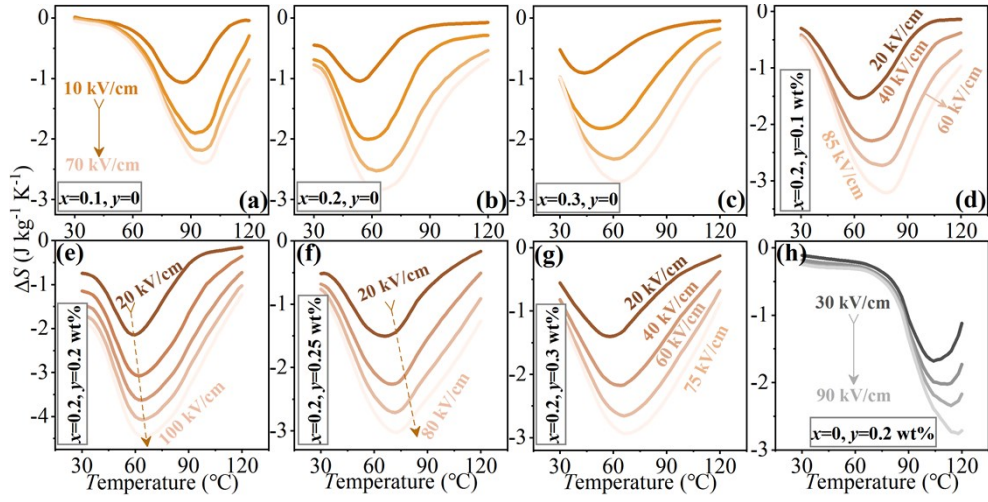

**Fig. S4.** Plots of  $\Delta S-T$  for BNT-BZ<sub>x</sub>T: yAlN with (a)  $x = 0.1$ ,  $y = 0$ , (b)  $x = 0.2$ ,  $y = 0$ , (c)  $x = 0.3$ ,  $y = 0$ , (d)  $x = 0.2$ ,  $y = 0.1$  wt%, (e)  $x = 0.2$ ,  $y = 0.2$  wt%, (f)  $x = 0.2$ ,  $y = 0.25$  wt%, (g)  $x = 0.2$ ,  $y = 0.3$  wt%, and (h)  $x = 0$ ,  $y = 0.2$  wt% under different electric fields.
